# Supplementary material for: Alkaline treatment of used carbon-brush anodes for restoring power generation of microbial fuel cells
Source: Royal Society of Chemistry journal article supplement (doi:10.1039/c8ra07216g), 2018-01-01
Supplement: c8ra07216g1.pdf [file c8ra07216g1.pdf]

*Alkaline treatment of used carbon-brush anodes for restoring power generation of microbial fuel cells*

Lin Li, Bo Jiang, Dawei Tang\*, Xiaoliang Zhang, Kunpeng Yuan, Qian Zhang

Key Laboratory of Ocean Energy Utilization and Energy Conservation of Ministry of Education, Dalian University of Technology, Dalian 116024, China

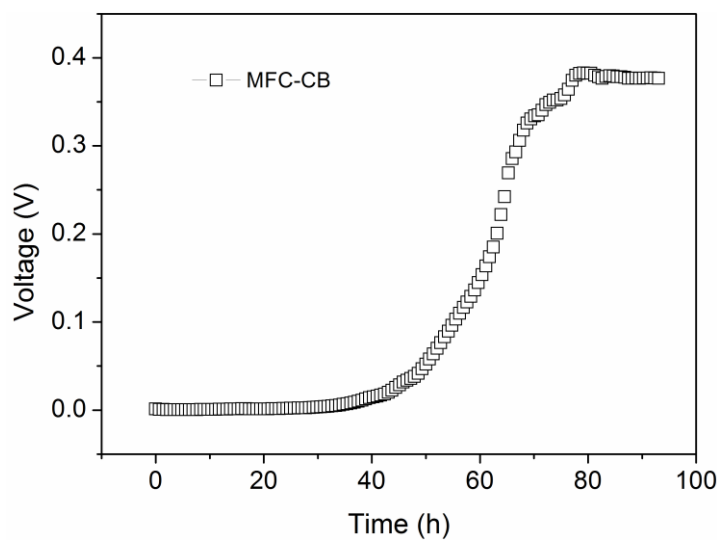

**Fig. S1.** Voltage evolution of MFC with the original carbon-brush anode during start-up.

---

\* Corresponding author

*E-mail address:* dwtang@dlut.edu.cn

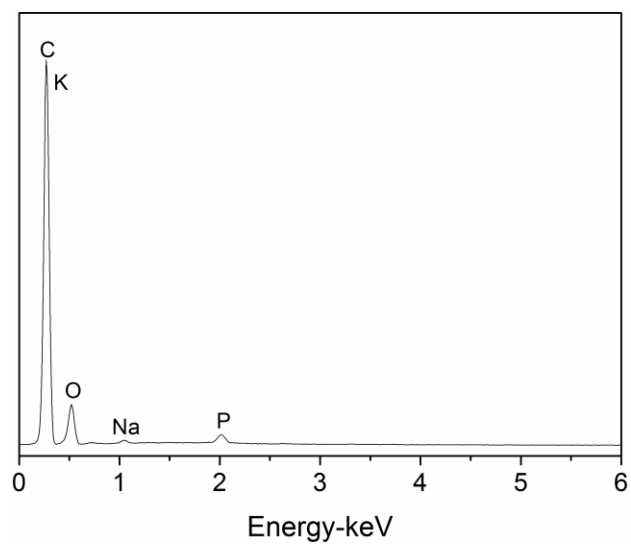

**Fig. S2.** EDS of the agglomeration particles.

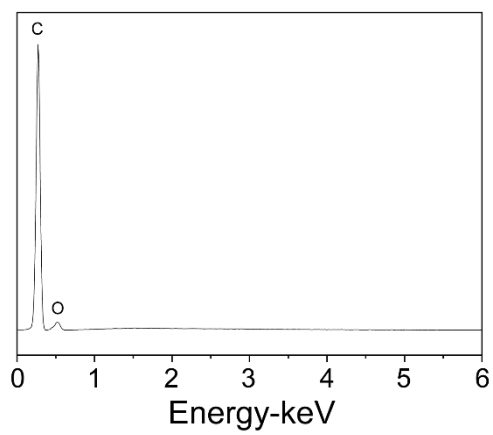

**Fig. S3.** EDS of the original carbon-brush anode.

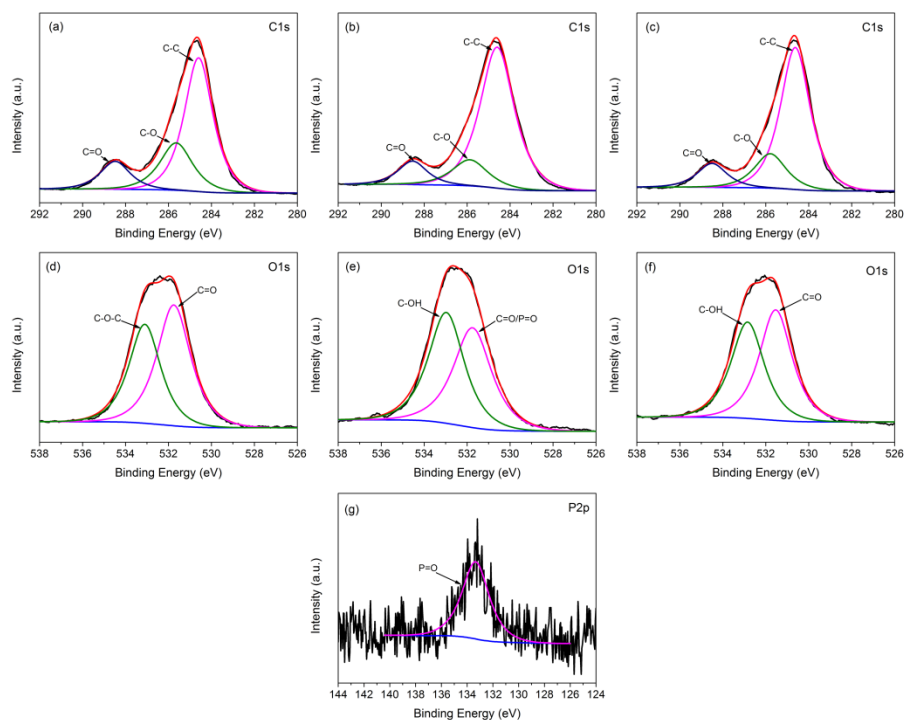

**Fig. S4.** High-resolution XPS scans of C1s for the original carbon-brush anode (a) and the used carbon-brush anode treated by carbonization (b) and alkaline soaking (c). High-resolution O1s scans of a (d), b (e), c (f). High-resolution spectrum of P2p of the carbonization-treated used anode (g).
